# Supplementary material
Source: PubMed Central journal article supplement (PMC6856969)

## Supplementary methods

**Table 1 Details of antibodies and suppliers**

| Name                                                                   | Type                  | Company                  | Cells                              | Usage  |
|------------------------------------------------------------------------|-----------------------|--------------------------|------------------------------------|--------|
| Goat anti-human FABP-4 antigen affinity-purified polyclonal antibody   | Primary               | (R&D systems)            | Human (adipocytes)                 | IHC    |
| Goat anti-human aggrecan antigen affinity-purified polyclonal antibody | Primary               | (R&D systems)            | Human (chondrocytes)               | IHC    |
| Mouse anti-human osteocalcin monoclonal antibody                       | Primary               | (R&D systems)            | Human (osteocytes)                 | IHC    |
| Alpha smooth muscle actin ( $\alpha$ SMA) (MAB1420)                    | Primary               | (R&D systems)            | Human MSCs                         | IHC    |
| Phalloidin-Atto 633                                                    | Primary               | Sigma-Aldrich            | Any                                | IHC    |
| DAPI                                                                   | stain                 | Santa-Cruz Biotechnology | Nuclear stain                      | IHC/FC |
| Annexin V PE                                                           | Apoptotic cell marker | ThermoFisher             | Phosphatidylserine on cell surface | FC     |

|                                                                                 |                       |                         |                      |     |
|---------------------------------------------------------------------------------|-----------------------|-------------------------|----------------------|-----|
| Northern Lights TM<br>NL557-conjugated<br>donkey anti-goat<br>antibody (NL001)  | Secondary             | (R&D systems)           | NA                   | IHC |
| Northern Lights TM<br>NL557-conjugated<br>donkey anti-mouse<br>antibody (NL007) | Secondary             | (R&D systems)           | NA                   | IHC |
| CD90 FITC                                                                       | Primary               | BD Biosciences          | Human MSCs           | FC  |
| CD90 APC                                                                        | Primary               | BD Biosciences          | Human MSCs           | FC  |
| CD73 PE                                                                         | Primary               | BD Biosciences          | Human MSCs           | FC  |
| CD105 PerCP-Cy<br>5.5                                                           | Primary               | BD Biosciences          | Human MSCs           | FC  |
| CD45 APC                                                                        | Primary               | BD Biosciences          | Leukocytes           | FC  |
| CD19 APC                                                                        | Primary               | BD Biosciences          | B-cells              | FC  |
| HLA-DR APC                                                                      | Primary               | BD Biosciences          | Myeloid cells        | FC  |
| CD34 APC                                                                        | Primary               | BD Biosciences          | Immature             | FC  |
| CD14 APC                                                                        | Primary               | BD Biosciences          | Myeloid cells        | FC  |
| CellROX® Green<br>Reagent                                                       | Stain                 | Thermofisher            | NA                   | FC  |
| Anti-CD19 antibody                                                              | Primary               |                         | Human B-cells        | IHC |
| Anti-Nestin antibody                                                            | Primary               | Abcam                   | Murine Stromal cells | IHC |
| Mouse Background<br>Blocker                                                     | Background<br>Blocker | Menarini<br>Diagnostics | NA                   | IHC |

## Supplementary Methods Table 2

### ELISA/cytokine bead assays

| Sl. No. | Analyte             | Company                 |
|---------|---------------------|-------------------------|
| 1       | CCL2/MCP-1          | Invitrogen (88-7399-88) |
| 2       | CXCL1/Gro- $\alpha$ | Qiagen (SEH00696A)      |
| 3       | CXCL2/Gro- $\beta$  | R&D systems (DY276-05)  |
| 4       | IL6                 | Invitrogen (88-7066-88) |
| 5       | IL8                 | Invitrogen (88-8086-88) |

### Supplementary Methods Table 3

#### Gene expression profile targets

| #  | Gene Symbol      | Gene RefSeq # |
|----|------------------|---------------|
| 1  | <i>PDGFR-2</i>   | NM_006206     |
| 2  | <i>PDGFR-1</i>   | NM_002609     |
| 3  | <i>Nbla00170</i> | NM_006617     |
| 4  | <i>FSP1</i>      | NM_002961     |
| 5  | <i>FAPA</i>      | NM_004460     |
| 6  | <i>IL-6</i>      | NM_000600     |
| 7  | <i>CD90</i>      | NM_006288     |
| 8  | <i>ACTA2</i>     | NM_001613     |
| 9  | <i>TN-C</i>      | NM_002160     |
| 10 | <i>FN</i>        | NM_002026     |
| 11 | <i>COL1A1</i>    | NM_000088     |
| 12 | <i>CXCL8</i>     | NM_000584     |
| 13 | <i>CXCL1</i>     | NM_001511     |
| 14 | <i>CXCL2</i>     | NM_002089     |
| 15 | <i>CCL2</i>      | NM_002982     |
| 16 | <i>MMP1</i>      | NM_002421     |
| 17 | <i>VEGF</i>      | NM_003376     |
| 18 | <i>FGF-2</i>     | NM_002006     |

## Supplementary Methods Table 4

### Primers for mitochondrial DNA detection

| Species | Genome                 | Forward Primer<br>Seq 5'-3'                      | Reverse Primer<br>Seq 5'-3'                      | Amplicon |
|---------|------------------------|--------------------------------------------------|--------------------------------------------------|----------|
| Mouse   | Mitochondria           | CCC AGC TAC TAC<br>CAT CAT TCA AGT               | GAT GGT TTG GGA<br>GAT TGG TTG ATG<br>T          | 117      |
| Human   | Mitochondria           | CCC CAC AAA CCC<br>CAT TAC TAA ACC<br>CA         | TTT CAT CAT GCG<br>GAG ATG TTG GAT<br>GG         | 221      |
| Mouse   | Nuclear beta<br>globin | CCA ATC TGC TCA<br>CAC AGG ATA GAG<br>AGG GCA GG | CCT TGA GGC TGT<br>CCA AGT GAT TCA<br>GGC CAT CG | 494      |
| Human   | Nuclear beta<br>globin | GAA GAG CCA<br>AGG ACA GGT AC                    | GGA AAA TAG ACC<br>AAT AGG CAG                   | 408      |

## **Supplementary methods – *in-vivo* work**

All animal experiments were performed according to UK Home Office approved protocols and institutional guidelines.

### **Disseminated NSG xenografts**

Disseminated SEM xenografts were established in sixteen 8-10-week-old NSG (Non obese diabetic severe combined immunodeficiency gamma) male mice (Charles River, Margate, UK) by tail vein injection of  $2 \times 10^6$  SEM cells expressing luciferase and blue fluorescent protein. One additional NSG male mouse not injected with SEM cells was used as a baseline control for imaging and subsequent analysis as a positive control for detection of murine mitochondrial DNA by PCR.

### **In vivo imaging**

Seven days after tail vein injection of SEM luciferase expressing cells, engraftment was confirmed by bioluminescent imaging. Mice were shaved and injected i.p. with 200  $\mu$ l of D-luciferin (Caliper Life Science, Cheshire, UK). They were then imaged under anaesthetic (Isoflurane) under IVIS 100 Lumina (Caliper Life Sciences, Cheshire, UK). The results were analyzed using Living Image 3.2 software. The same protocol for in vivo imaging was used to assess leukemic burden at day +3 following treatment.

### **Chemotherapy treatment**

Ten days following tail vein injection of SEM cells, the mice were split into four treatment groups of four mice each. The different groups of mice were treated with

either 200µl PBS (control), AraC 100mg/kg in 200µl PBS, VCR 0.25mg/kg in 200µl PBS or Nocodazole 9mg/kg in 200µl PBS i.p. daily for two days.

### **Sacrifice and Analysis**

Two days following the final dose of treatment the mice were humanely sacrificed and bone marrow cells were extracted by isolation and crushing of the tibias and one femur. One femur per mouse was sent for histopathology. SEM cells were identified or flow sorted by BFP expression for subsequent analysis, including intracellular ROS (CellROX Green™, ThermoFisher C10444), mitochondrial mass (Green Mitotracker, ThermoFisher M7514) and DNA extraction for identification of murine mitochondria DNA by PCR. For isolation and expansion of murine stromal cells, residual cells post extraction of SEM cells were plated in 6 well plates at a density of  $1-2 \times 10^6$  per ml in  $\alpha$ MEM media supplemented with 10% FBS and Pen-Step-Glut. Seventy-two hours later the media was removed, washed with PBS and new media added. Two weeks later the adherent cells were removed with trypsin, washed with PBS and re-plated in a glass bottom plate for imaging. Following overnight culture to allow the stromal cells to adhere, the cells were fixed and stained with Phalloidin, DAPI and  $\alpha$ SMA as previously described. The plates were then imaged using a fluorescent microscope as described previously in methods.

### **Immunohistochemistry of femur sections**

Immediately following humane sacrifice of the mice, one femur was removed and fixed in 10% neutral buffered formalin. The samples were decalcified in 10% formic acid for 9-10 hours then processed and embedded. Following sectioning the samples were stained with the appropriate primary and secondary antibodies.

## Supplementary figure legends

S1. Schema of in vivo experiments indicating timelines and experimental outputs from two independent experiments

S2. Agarose gel images showing PCR products from DNA extracted from human SEM cells xenografted into NSG mice. Murine nuclear and mitochondrial DNA and human mitochondrial DNA, is present as labelled. Lane 1, murine control bone marrow cells, Lane 2 Human SEM cell control, Lanes 3-6 SEM xenograft cells sorted on BFP after control treatment Lanes 7-10 SEM xenograft cells sorted on BFP after AraC treatment.

S3. Immunohistochemistry of sections of representative whole femora from each treatment group. Femora are single stained for human CD19 (brown) and murine nestin (pink) plus dual-stained for human CD19 and murine nestin. In the AraC but not the other conditions, CD19+ cells are seen closely associating with a nestin+ niche.



# Supplementary figures

**S1**

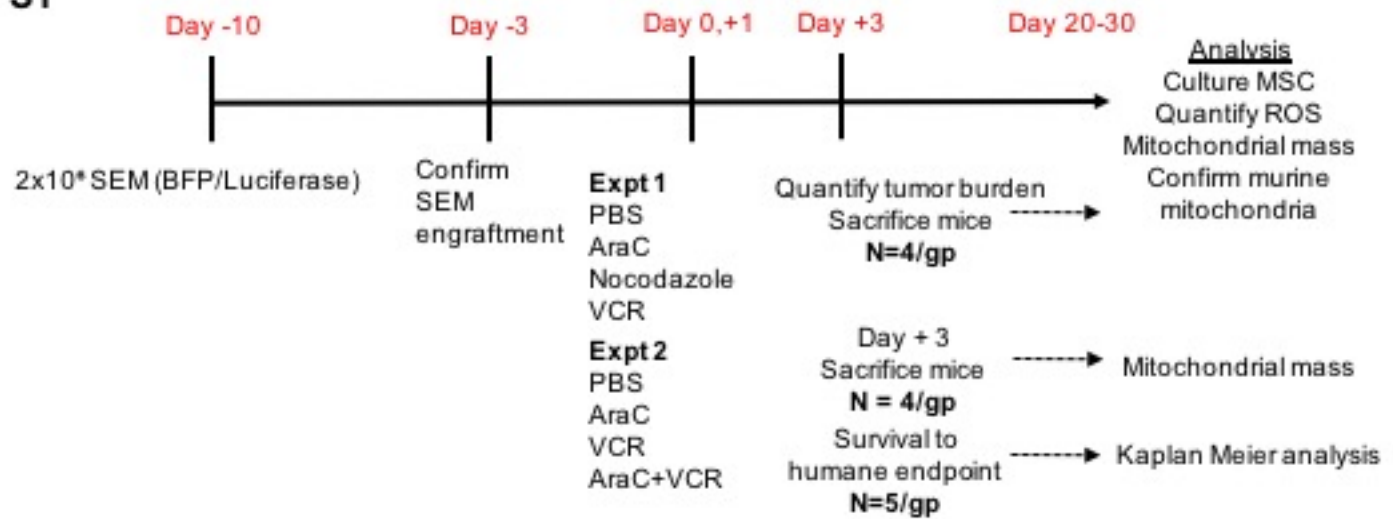

**S2**

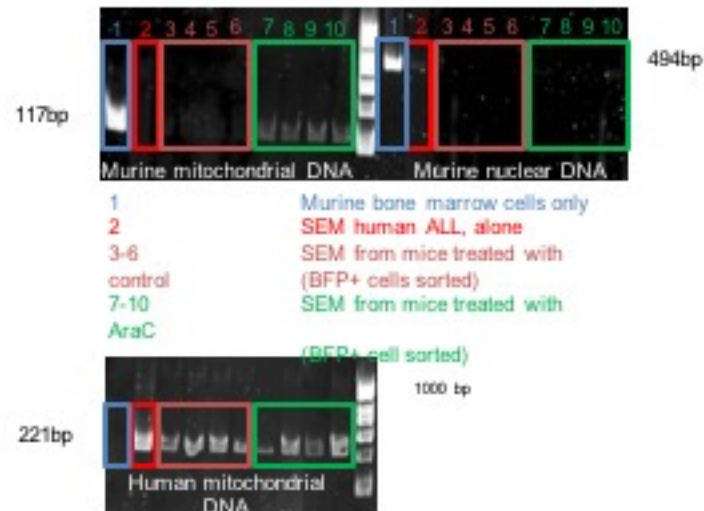

**S3**

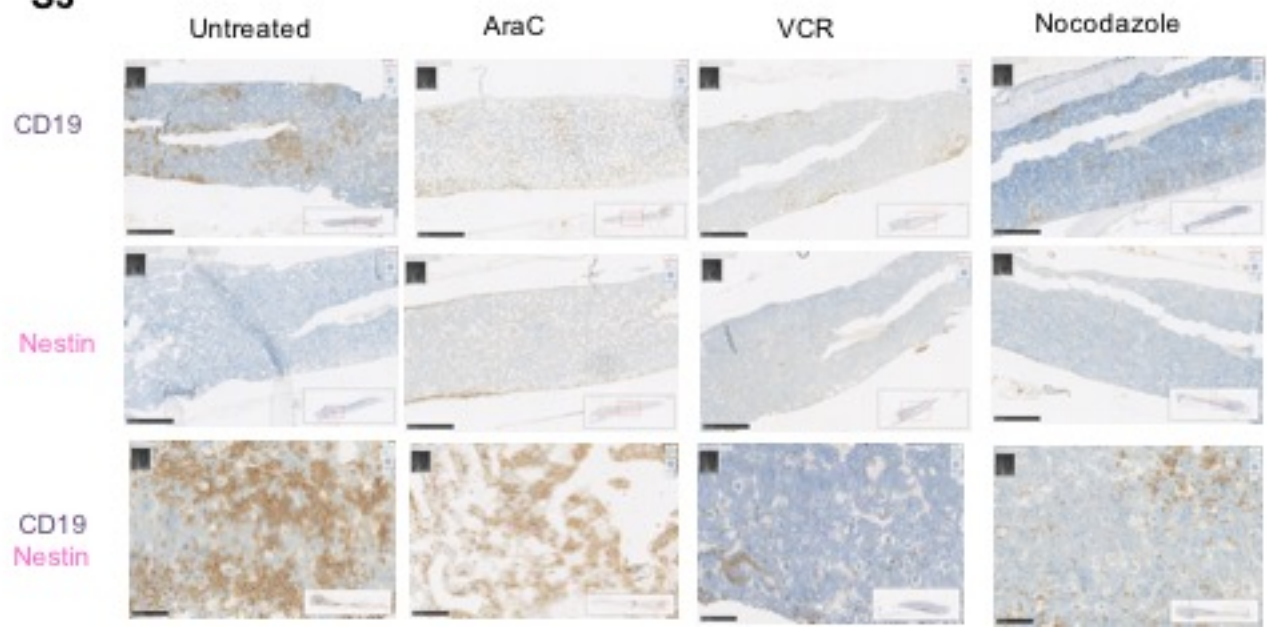

Supplement: bloodBLD2019001398-suppl1.pdf [file bloodBLD2019001398-suppl1.pdf]
